# Supplementary material for: Principal cells of the brainstem’s interaural sound level detector are temporal differentiators rather than integrators
Source: eLife journal article supplement (doi:10.7554/elife.33854), 2018-06-14
Supplement: supp [file elife-33854-supp-v1.zip]

Archive with 11 entries (11 files):
- elife_poa_e33854_Supplementary_File_1.docx
- elife_poa_e33854_Figure_7_figure_supplement_2.pdf
- elife_poa_e33854_Figure_9_figure_supplement_2.pdf
- elife_poa_e33854_Figure_8_figure_supplement_1.pdf
- elife_poa_e33854_Figure_7_figure_supplement_1.pdf
- elife_poa_e33854_Figure_9_figure_supplement_1.pdf
- elife_poa_e33854_Source_code_1.m
- elife_poa_e33854_Figure_5_figure_supplement_1.pdf
- elife_poa_e33854_Figure_7_figure_supplement_3.pdf
- elife_poa_e33854_Figure_4_figure_supplement_1.pdf
- elife_poa_e33854_Transparent_Reporting_File.pdf
