# Supplementary figures and images for: Principal cells of the brainstem’s interaural sound level detector are temporal differentiators rather than integrators
Source: eLife journal article supplement (doi:10.7554/elife.33854), 2018-06-14

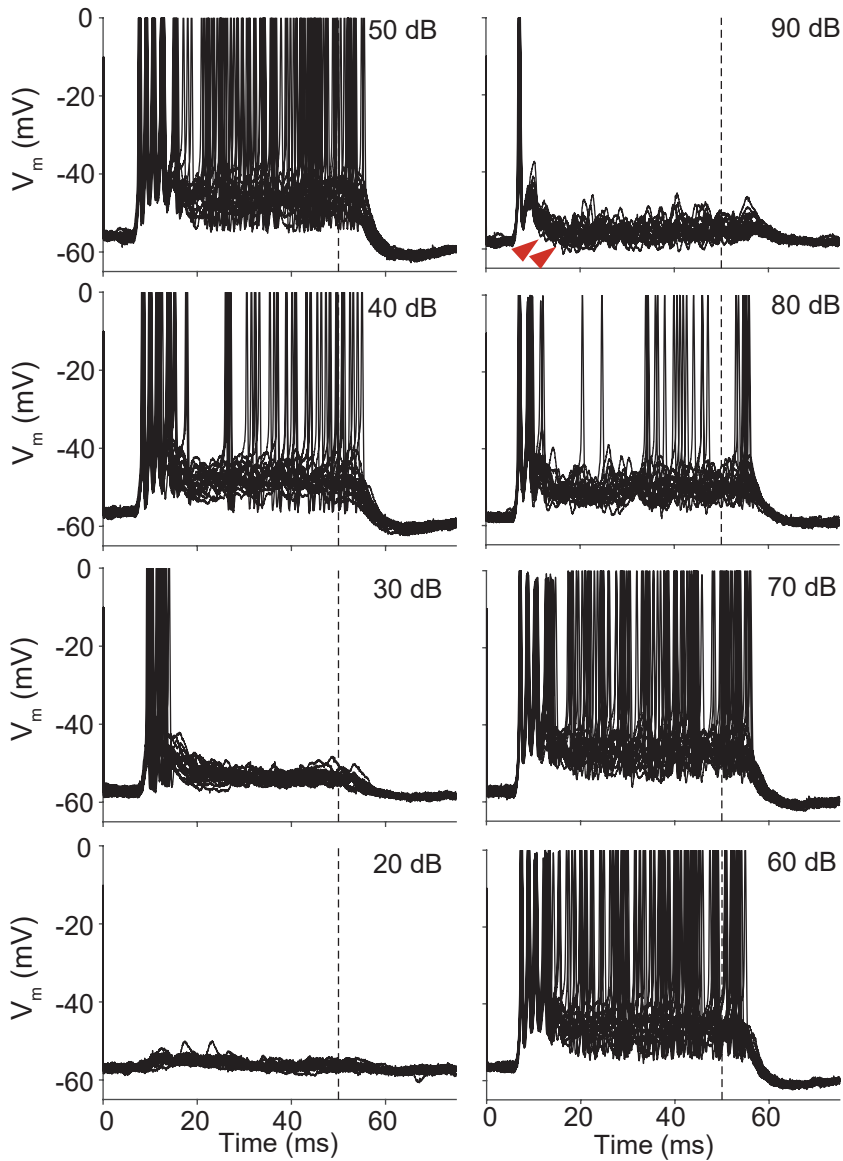

Supplement: supp [file elife-33854-supp-v1.zip › elife_poa_e33854_Figure_7_figure_supplement_2.pdf]

**A**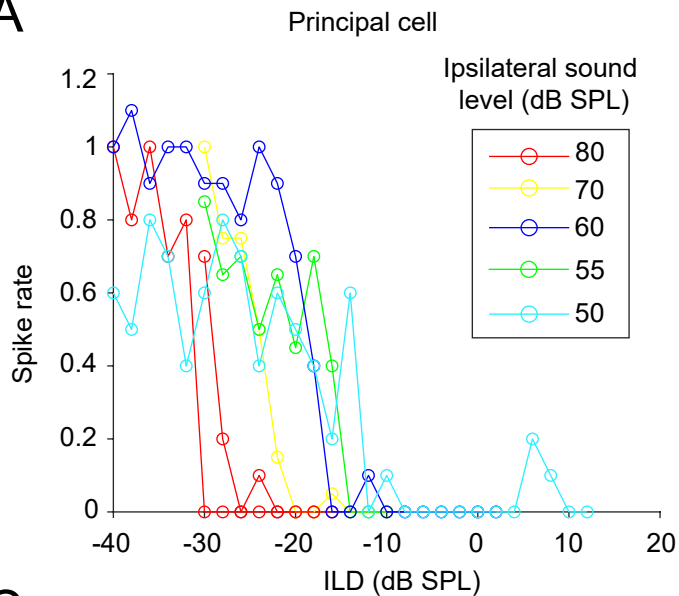**B**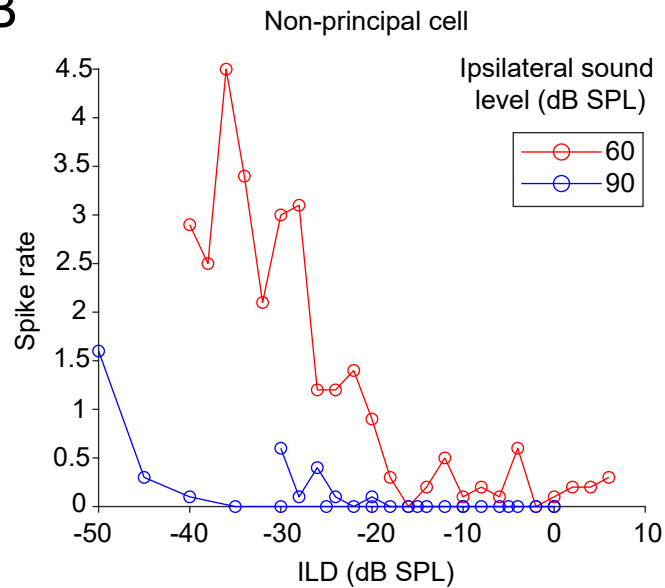**C**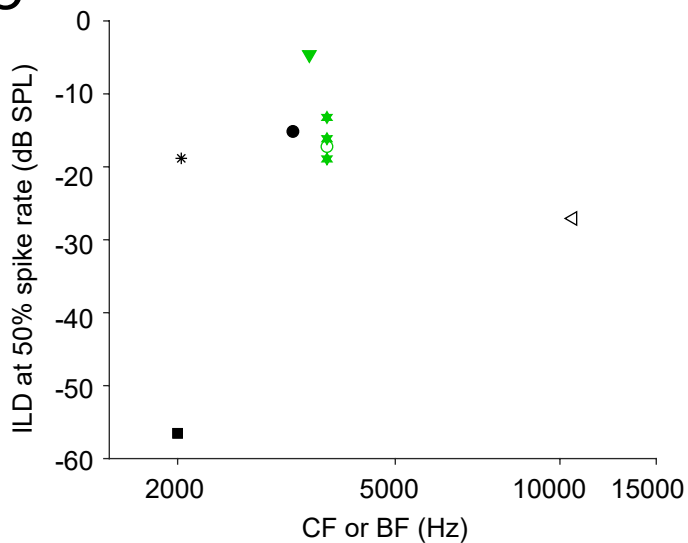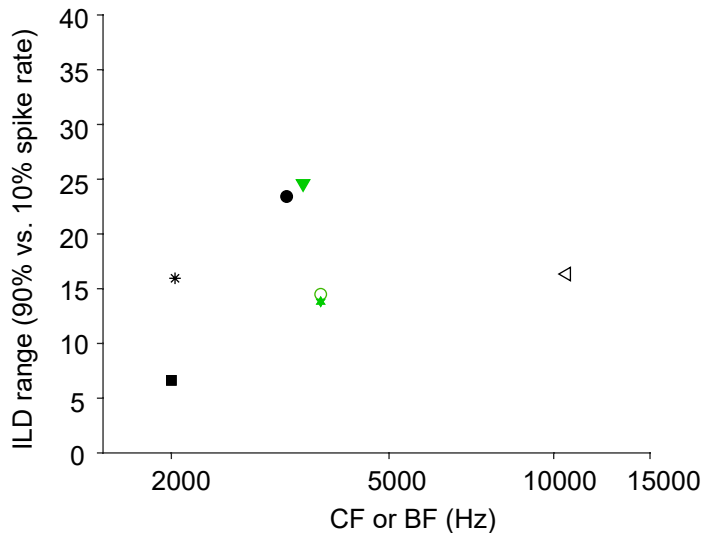

Supplement: supp [file elife-33854-supp-v1.zip › elife_poa_e33854_Figure_9_figure_supplement_2.pdf]

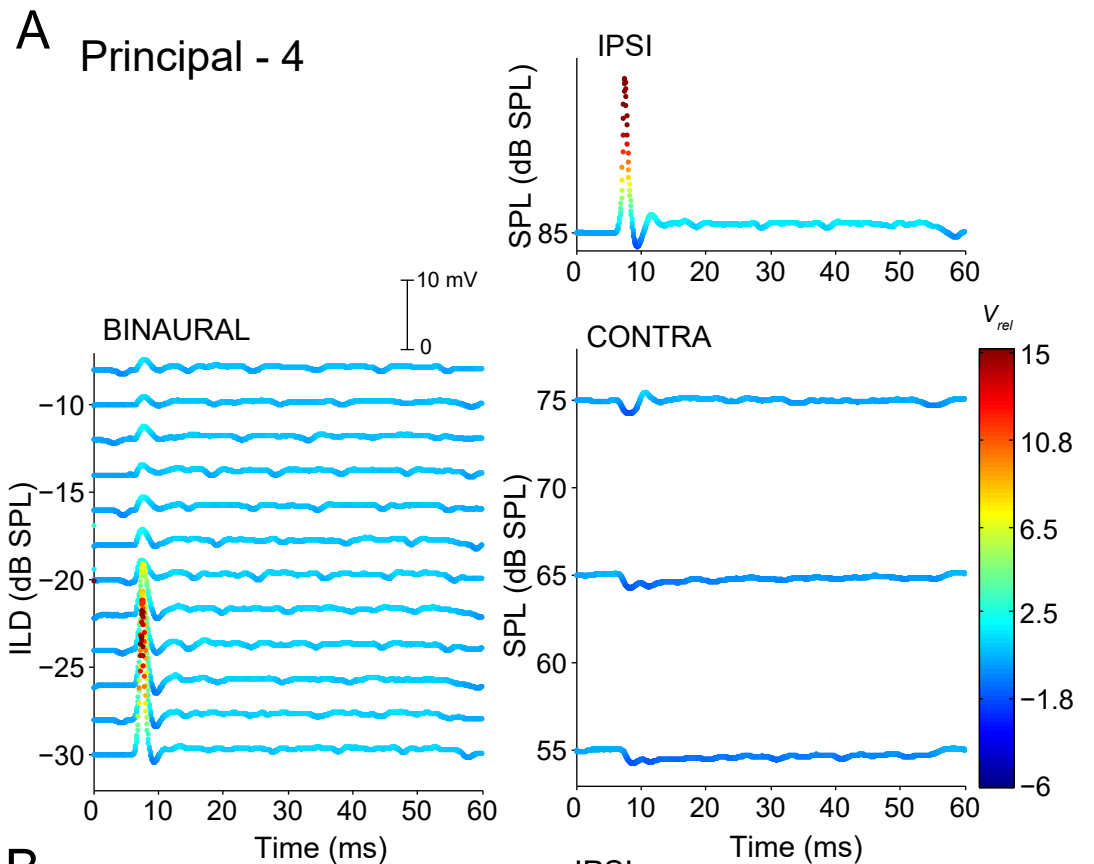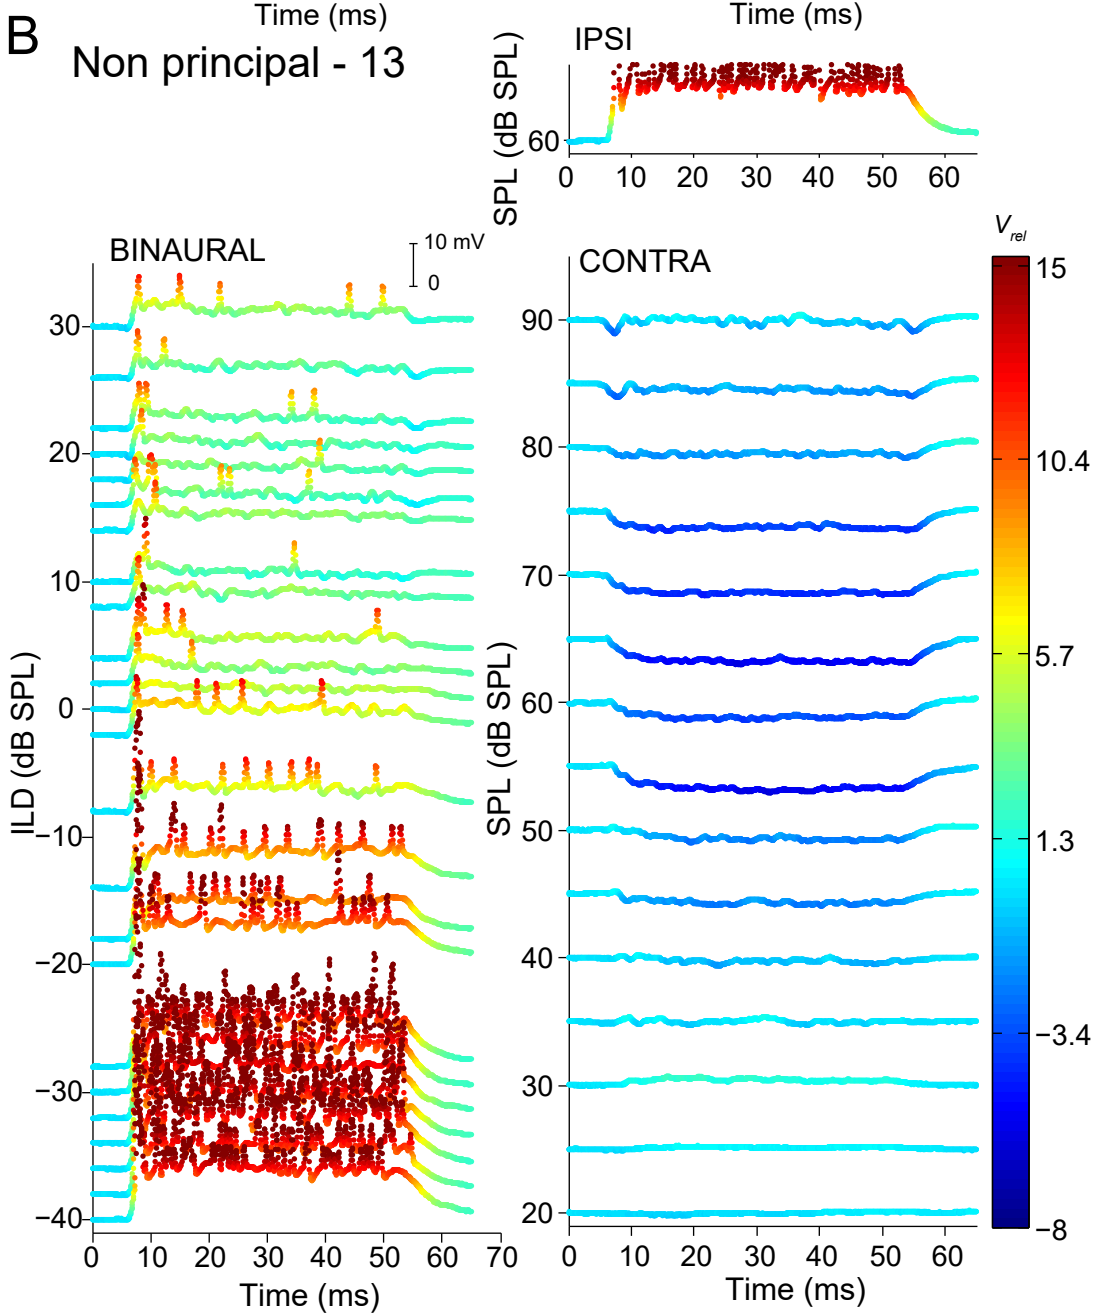

Supplement: supp [file elife-33854-supp-v1.zip › elife_poa_e33854_Figure_8_figure_supplement_1.pdf]

**A**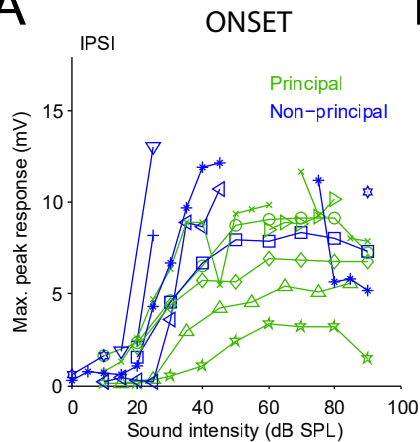**B**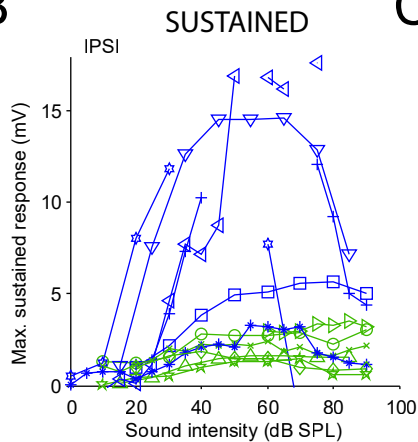**C**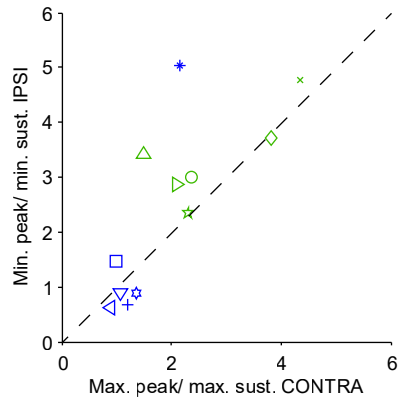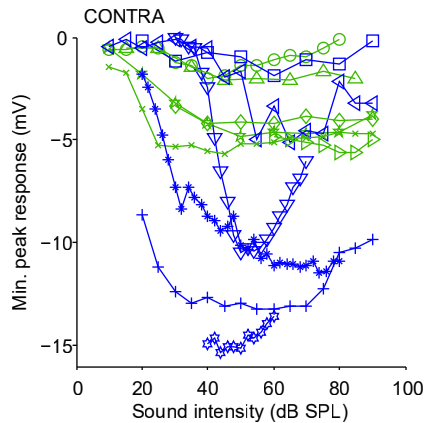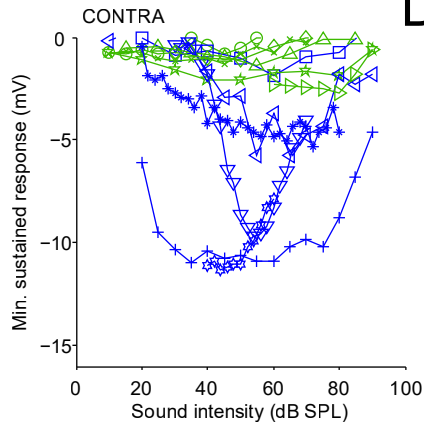**D**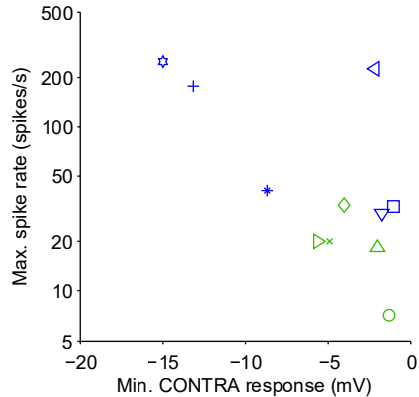

Supplement: supp [file elife-33854-supp-v1.zip › elife_poa_e33854_Figure_7_figure_supplement_1.pdf]

**A**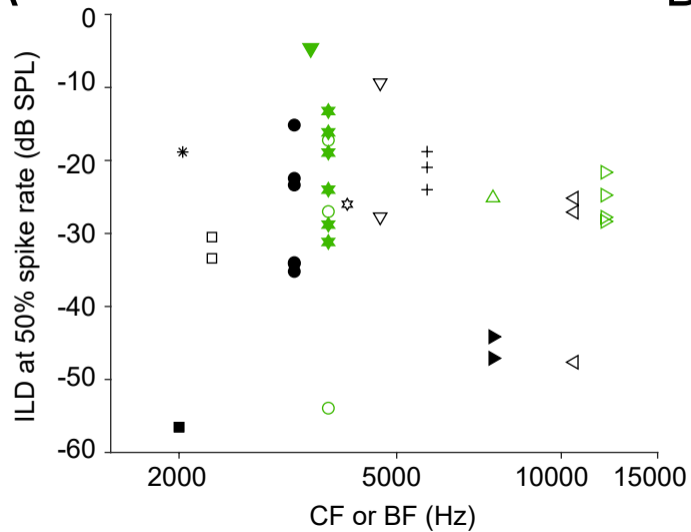**B**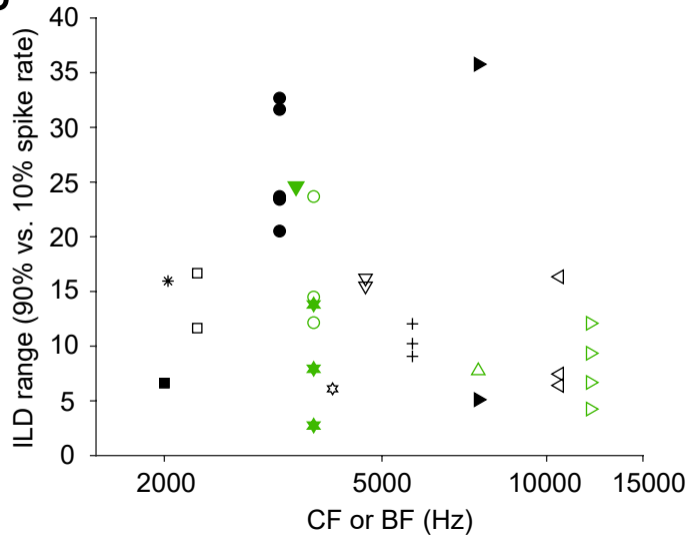

Supplement: supp [file elife-33854-supp-v1.zip › elife_poa_e33854_Figure_9_figure_supplement_1.pdf]

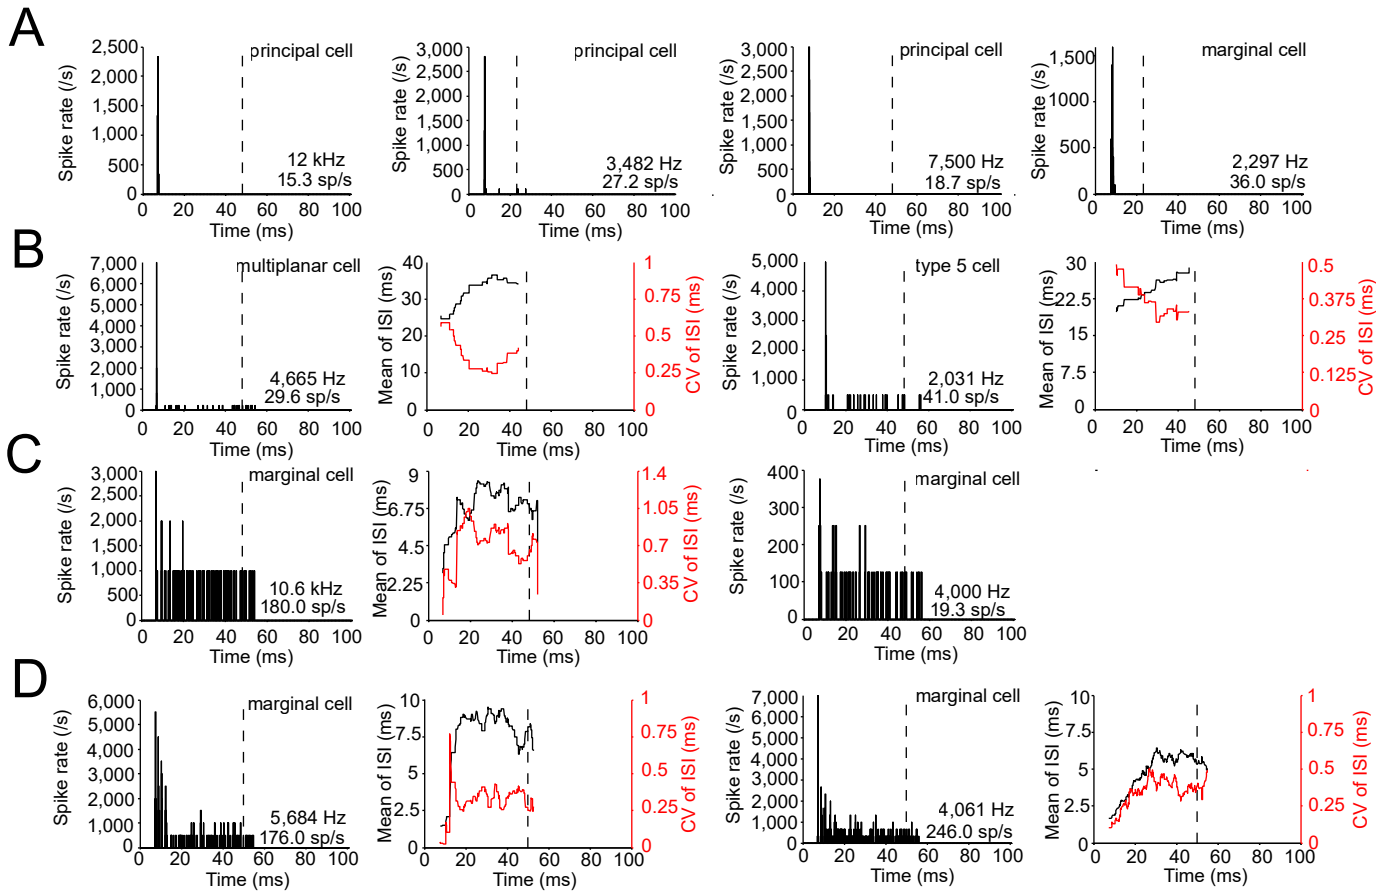

Supplement: supp [file elife-33854-supp-v1.zip › elife_poa_e33854_Figure_5_figure_supplement_1.pdf]

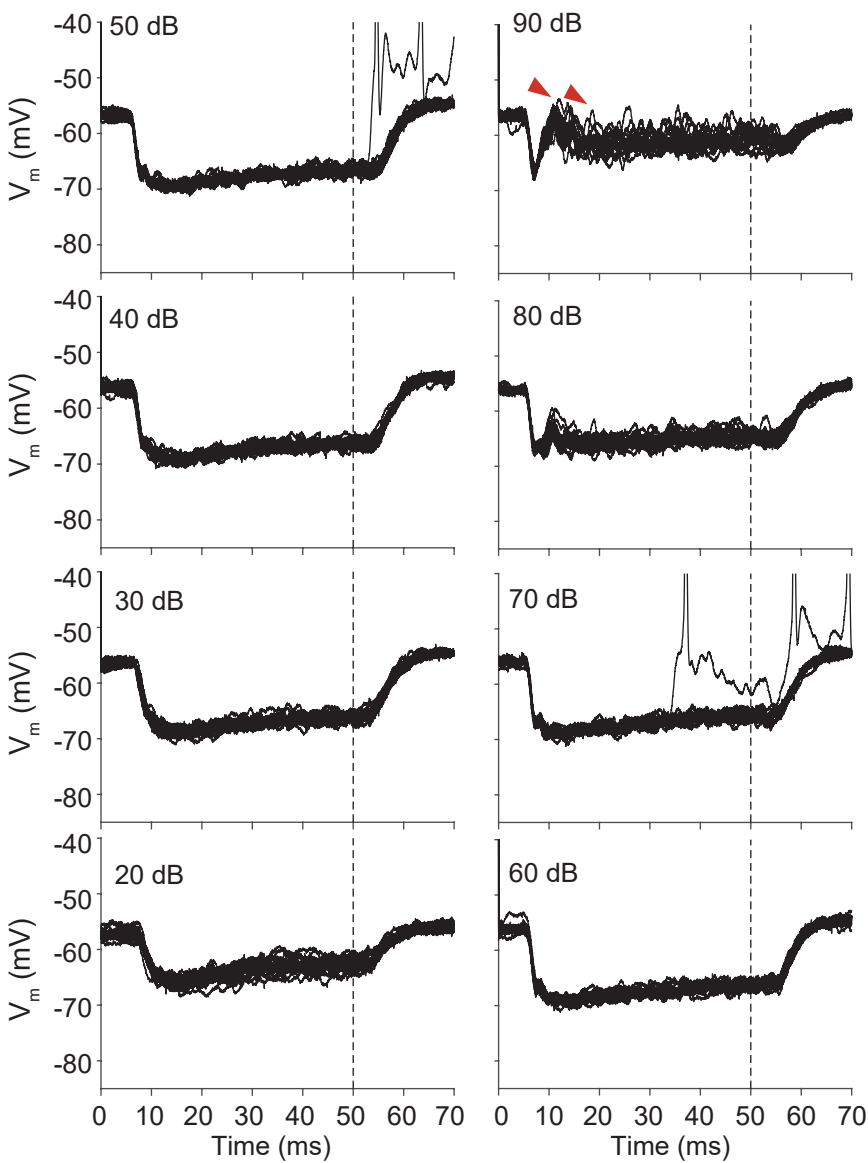

Supplement: supp [file elife-33854-supp-v1.zip › elife_poa_e33854_Figure_7_figure_supplement_3.pdf]

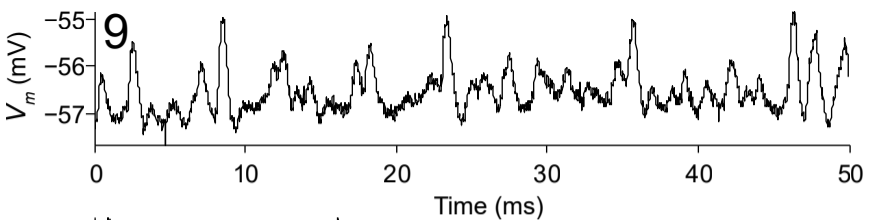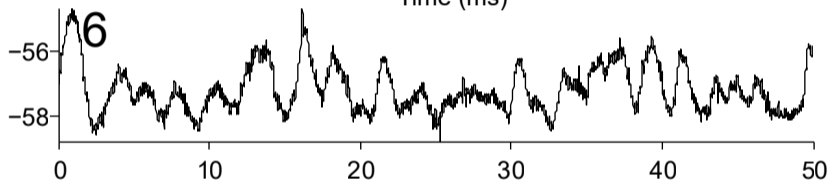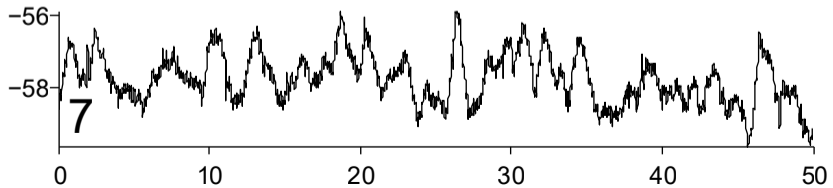

Supplement: supp [file elife-33854-supp-v1.zip › elife_poa_e33854_Figure_4_figure_supplement_1.pdf]
